# Supplementary material for: Rhodium-catalyzed intramolecular reductive aldol-type cyclization: Application for the synthesis of a chiral necic acid lactone
Source: publisher site journal article supplement (doi:10.3762/bjoc.18.176), 2022-12-02

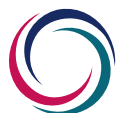

## Supporting Information

for

### **Rhodium-catalyzed intramolecular reductive aldol-type cyclization: Application for the synthesis of a chiral necic acid lactone**

Motoyuki Isoda, Kazuyuki Sato, Kenta Kameda, Kana Wakabayashi, Ryota Sato, Hideki Minami, Yukiko Karuo, Atsushi Tarui, Kentaro Kawai and Masaaki Omote

*Beilstein J. Org. Chem.* **2022**, *18*, 1642–1648. doi:10.3762/bjoc.18.176

### **General procedures and analytical data, including copies of $^1\text{H}$ NMR, $^{13}\text{C}$ NMR, and X-ray crystallography**

## Table of contents

|                                                                                |         |
|--------------------------------------------------------------------------------|---------|
| General information .....                                                      | S2      |
| Materials .....                                                                | S2      |
| Experimental section                                                           |         |
| General procedure for the cyclization precursor ( <b>1</b> ). ....             | S2      |
| General procedure for intramolecular<br>reductive aldol-type cyclization. .... | S3      |
| Spectroscopic data .....                                                       | S4–S6   |
| Thermal ellipsoid plot of the crystallographic structure. ....                 | S7–S14  |
| References .....                                                               | S15     |
| NMR charts .....                                                               | S16–S24 |

### General information:

$^1\text{H}$  NMR and  $^{13}\text{C}$  NMR spectra were recorded on JEOL JNM-ECZS-400 spectrometers. Chemical shifts of  $^1\text{H}$  NMR are reported in ppm from signal of tetramethylsilane (TMS: 0 ppm) as an internal standard. Chemical shifts of  $^{13}\text{C}$  NMR are reported in ppm from signal of  $\text{CDCl}_3$  (77.20 ppm) as an internal standard. All data are reported as follows: chemical shifts, relative integration value, multiplicity (s = singlet, d = doublet, t = triplet, q = quartet, br s = broad singlet, m = multiplet), coupling constants (Hz). Mass spectra were obtained on JEOL JMS-700T spectrometers. Melting points were measured on Yanagimoto micro melting point apparatus MP-S3.

### Materials:

Dichloromethane (DCM) was distilled over phosphorus pentoxide just before use. Tetrahydrofuran (THF) was purchased from Kanto Chemical Co. Inc. as “Dehydrated”. All other solvents were distilled under inert argon atmosphere or under reduced pressure before use. All commercially available reagents were used without further purification. All experiments were carried out under argon atmosphere in flame-dried glassware using standard inert techniques for introducing reagents unless otherwise noted.

### Experimental section:

#### General procedure for the cyclization precursor (1).

To a solution of hydroxyketone (5 mmol) in DCM (50 mL) was added  $\text{Et}_3\text{N}$  (8 mmol) and stirred for 30 min. Then,  $\alpha,\beta$ -unsaturated acid chloride (6 mmol) was added to the mixture and stirred until TLC analysis showed the reaction to be complete. The mixture was quenched with 10% HCl and extracted with DCM. The organic layer was washed with sat. NaCl and dried over  $\text{MgSO}_4$ . The solvent was removed in vacuo to give the crude mixture. The mixture was purified by recrystallization from hexane and to obtain the product **1**.

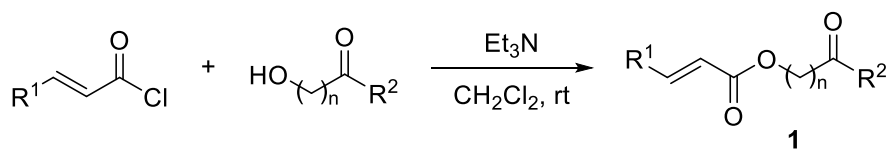

### General procedure for intramolecular reductive aldol-type cyclization.

To a solution of  $[\text{RhCl}(\text{cod})]_2$  (2 mol %) in DCM (2.5 mL) was added cyclization precursor (**1**; 1 mmol) at 0 °C, and then 1.0 M  $\text{Et}_2\text{Zn}$  in hexane (1.2 mL) was gradually added to the mixture. After consumption of the starting material **1** as monitored by TLC, the mixture was quenched with 10% HCl and extracted with AcOEt. The organic layer was washed with sat. NaCl and dried over  $\text{MgSO}_4$ . The solvent was removed in vacuo, and the residue was purified by column chromatography ( $\text{SiO}_2$ ; AcOEt/hexane 4:1) to give the product.

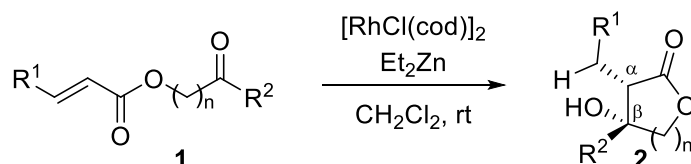

### Synthesis for a chiral necic acid lactone.

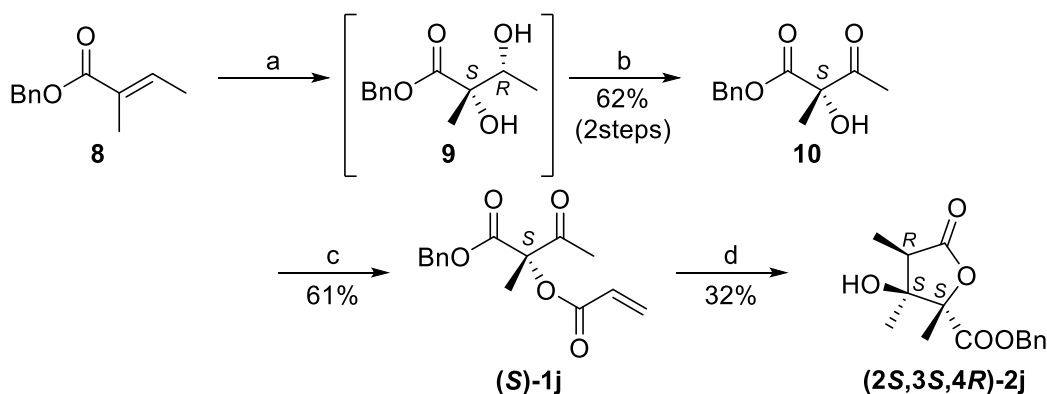

a)  $\text{CH}_3\text{SO}_2\text{NH}_2$ , AD-mix- $\beta$ , *t*-BuOH,  $\text{H}_2\text{O}$ . b)  $\text{SO}_3\cdot\text{Py}$ ,  $\text{Et}_3\text{N}$ , DMSO,  $\text{CH}_2\text{Cl}_2$ .  
c) DMAP,  $\text{CH}_2\text{Cl}_2$ ,  $\text{Et}_3\text{N}$ , acryloyl chloride, hydroquinone. d)  $[\text{RhCl}(\text{cod})]_2$ , THF,  $\text{Et}_2\text{Zn}$ .

### Benzyl (*S*)-2-hydroxy-2-methyl-3-oxobutanoate (**10**):

Under an Ar atmosphere, to a solution of  $\text{CH}_3\text{SO}_2\text{NH}_2$  (4.5 mmol) and AD-mix- $\beta$  (15 g) in *t*-BuOH/ $\text{H}_2\text{O}$  1:1 (18 mL) was stirred for 15 min, then the mixture was cooled to 0 °C. Benzyl tiglate (**8**, 9 mmol) was added to the mixture and it was stirred for 16 h at the same temperature. After consumption of starting material **8** as monitored by TLC, the mixture was quenched with sat.  $\text{NH}_4\text{Cl}$  and extracted with DCM. The organic layer was washed with sat. NaCl and dried over  $\text{MgSO}_4$ . The solvent was removed in vacuo, and the residue was passed through a short column ( $\text{SiO}_2$ ; AcOEt/hexane 3:7) to correct **9**.

Under an Ar atmosphere, to a solution of corrected **9** in DCM (30 mL) was added DMSO (5.5 mL) and  $\text{Et}_3\text{N}$  (45 mmol) and then a solution of  $\text{SO}_3\cdot\text{Py}$  (28 mmol) in DMSO (14 mL) was added to the mixture. The resulting mixture was stirred for 24 h at ambient temperature, then it was quenched with sat.  $\text{NH}_4\text{Cl}$  and extracted with DCM. The organic layer was washed with sat. NaCl and dried over  $\text{MgSO}_4$ . The solvent was removed in vacuo, and the residue was purified by column chromatography ( $\text{SiO}_2$ ; AcOEt/hexane 1:4) to give the product **10** in 62% (1.25g, 5.6 mmol, 96% ee) from **8**.

**Benzyl (*S*)-2-(acryloyloxy)-2-methyl-3-oxobutanoate ((*S*)-1j):**

Under an Ar atmosphere, to a solution of DMAP (0.23 mmol) in DCM (2 mL) was added **5** (2.23 mmol) and Et<sub>3</sub>N (6.5 mmol) at 0 °C and the mixture was stirred for 30 min at the same temperature. To the mixture was added acryloyl chloride (4.9 mmol) and hydroquinone (0.5 mmol) and stirred overnight at the same temperature. The mixture was quenched with sat. NH<sub>4</sub>Cl and extracted with DCM. The organic layer was washed with sat. NaCl and dried over MgSO<sub>4</sub>. The solvent was removed in vacuo, and the residue was passed through a short column (SiO<sub>2</sub>; AcOEt/hexane 1:4) to give the product (*S*)-**1j** in 61% (378 mg, 1.37 mmol) from **3**.

**Benzyl (2*S*,3*S*,4*R*)-3-hydroxy-2,3,4-trimethyl-5-oxotetrahydrofuran-2-carboxylate (2j):**

To a solution of [RhCl(cod)]<sub>2</sub> (2 mol %) in THF (3.25 mL) was added cyclization precursor ((*S*)-**1j**; 1.3 mmol) at ambient temperature, and then 1.0 M Et<sub>2</sub>Zn in hexane (1.56 mL) was gradually added to the mixture and the mixture was stirred for 48 h. The mixture was quenched with 10% HCl and extracted with AcOEt. The organic layer was washed with sat. NaCl and dried over MgSO<sub>4</sub>. The solvent was removed in vacuo, and the residue including the diastereomeric mixture was purified by column chromatography (AcOEt/toluene 4:1) to give the product (2*S*,3*S*,4*R*)-**2j** in 32% (116 mg, 0.41 mmol).

**Spectroscopic data:****Benzyl (*S*)-2-(acryloyloxy)-2-methyl-3-oxobutanoate ((*S*)-1j)**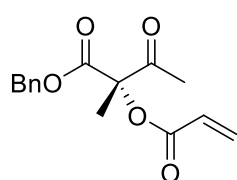

Pale yellow oil; <sup>1</sup>H NMR (400 MHz, CDCl<sub>3</sub>) δ: 1.77 (s, 3H), 2.33 (s, 3H), 5.20 (s, 2H), 5.95 (dd, *J* = 10.5, 1.2 Hz, 1H), 6.21 (dd, *J* = 17.3, 10.5 Hz, 1H), 6.49 (dd, *J* = 17.3, 1.1 Hz, 1H), 7.30–7.38 (5H, m); MS *m/z*: 276 (*M*<sup>+</sup>). HR-MS Calcd for C<sub>15</sub>H<sub>16</sub>O<sub>5</sub>: 276.0998 (*M*<sup>+</sup>), Found: 276.0992; IR (neat) cm<sup>-1</sup>: 1193, 1267, 1634, 1724, 3462.

**(3*R*,4*R*/3*S*,4*S*)-4-Hydroxy-3,5,5-trimethyl-4-phenyldihydrofuran-2(3*H*)-one (syn-2a)<sup>1</sup>**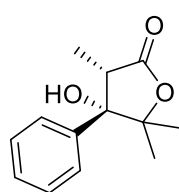

A colorless solid; mp 142–146°C; <sup>1</sup>H NMR (400 MHz, CDCl<sub>3</sub>) δ: 1.03 (s, 3H), 1.23 (d, *J* = 7.2 Hz, 3H), 1.56 (s, 3H), 2.04 (s, 1H), 3.60 (q, *J* = 7.2 Hz, 1H), 7.35–7.49 (m, 5H); <sup>13</sup>C NMR (100 MHz, CDCl<sub>3</sub>) δ: 7.59, 20.17, 25.40, 42.30, 83.33, 88.44, 126.4, 128.9, 129.0, 138.4, 176.7; HR-MS Calcd for C<sub>13</sub>H<sub>16</sub>O<sub>3</sub>: 220.1099 (*M*<sup>+</sup>), Found: 220.1096; IR (KBr) cm<sup>-1</sup>: 3439, 1749.

**(3*R*,4*S*/3*S*,4*R*)-4-Hydroxy-3,5,5-trimethyl-4-phenyldihydrofuran-2(3*H*)-one (*anti*-2a)<sup>1</sup>**

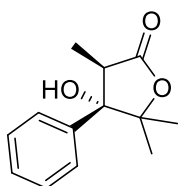

A colorless solid; mp 185–187°C; <sup>1</sup>H NMR (400 MHz, CDCl<sub>3</sub>) δ: 0.99 (d, *J* = 7.2 Hz, 3H), 1.01 (s, 3H), 1.60 (s, 3H), 2.41 (s, 1H), 3.28 (q, *J* = 7.2 Hz, 1H), 7.28–7.40 (m, 5H); <sup>13</sup>C NMR (100 MHz, CDCl<sub>3</sub>) δ: 8.92, 23.82, 24.22, 46.03, 83.58, 87.93, 126.1, 128.1, 128.7, 138.9, 176.7; HR-MS Calcd for C<sub>13</sub>H<sub>16</sub>O<sub>3</sub>: 220.1099 (M<sup>+</sup>), Found: 220.1105; IR (KBr) cm<sup>-1</sup>: 3439, 1749.

**(3*S*,4*S*,5*R*/3*R*,4*R*,5*S*)-4-Hydroxy-3-methyl-4,5-diphenyldihydrofuran-2(3*H*)-one (Major form) (2b)**

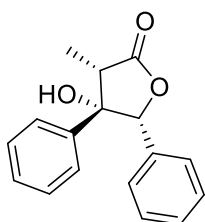

A colorless solid; mp: 150.5–152.5 °C; <sup>1</sup>H NMR (400 MHz, CDCl<sub>3</sub>) δ: 1.19 (d, *J* = 6.86 Hz, 3H), 1.68 (d, *J* = 1.37 Hz, 1H), 3.19 (qd, *J* = 5.49, 1.37 Hz, 1H), 5.80 (s, 1H), 7.06–7.09 (m, 2H), 7.27–7.46 (m, 8H); <sup>13</sup>C NMR (CDCl<sub>3</sub>) δ: 7.0, 49.0, 81.6, 86.9, 125.6, 126.7, 128.4, 128.8, 129.0, 129.3, 132.0, 139.1, 176.7; HR-MS Calcd for C<sub>17</sub>H<sub>16</sub>O<sub>3</sub>: 268.1099 (M<sup>+</sup>), Found: 268.1098; IR (KBr) cm<sup>-1</sup>: 698, 942, 1449, 1772, 3468.

**4-Hydroxy-3-methyl-4-phenyldihydrofuran-2(3*H*)-one (*syn*-form) (2c)**

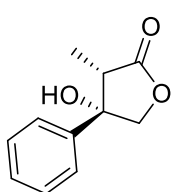

A colorless oil; <sup>1</sup>H NMR (CDCl<sub>3</sub>) δ: 1.18 (d, *J* = 7.32 Hz, 3H), 3.00 (q, *J* = 7.32 Hz, 1H), 3.15 (br s, 1H), 4.35 (d, *J* = 10.1 Hz, 1H), 4.39 (d, *J* = 10.1 Hz, 1H), 7.33–7.50 (m, 5H); <sup>13</sup>C NMR (CDCl<sub>3</sub>) δ: 6.9, 45.7, 78.3, 79.9, 125.3, 128.5, 129.0, 139.5, 178.2; HR-MS Calcd for C<sub>11</sub>H<sub>12</sub>O<sub>3</sub><sup>+</sup>: 192.0786 (M<sup>+</sup>), Found: 192.0790 (M<sup>+</sup>); IR (neat) cm<sup>-1</sup>: 701, 1187, 1772, 2983, 3448.

**4-Hydroxy-3,4-dimethyltetrahydro-2*H*-pyran-2-one (Diastereomeric mixture) (2d)**

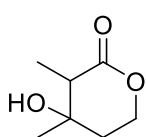

A colorless oil; <sup>1</sup>H NMR (CDCl<sub>3</sub>) δ: 1.26 (d, *J* = 7.32 Hz, 0.16H), 1.27 (s, 0.16H), 1.31 (d, *J* = 7.32 Hz, 2.84H), 1.38 (s, 2.84H), 1.93–2.14 (m, 3H), 2.46 (q, *J* = 7.32 Hz, 0.95H), 2.67 (q, *J* = 7.32 Hz, 0.05H), 4.25–4.31 (m, 1H), 4.47–4.57 (m, 1H); <sup>13</sup>C NMR (CDCl<sub>3</sub>) δ: 9.2, 11.7, 25.4, 28.3, 36.3, 37.4, 46.2, 47.7, 65.0, 65.3, 70.2, 70.8, 174.0, 174.7; HR-MS (FAB<sup>+</sup>) Calcd for C<sub>7</sub>H<sub>13</sub>O<sub>3</sub><sup>+</sup>: 145.0865 [M+H]<sup>+</sup>, Found: 145.0874 [M+H]<sup>+</sup>; IR (neat) cm<sup>-1</sup>: 740, 930, 1242, 1433, 1587, 2916, 3017.

#### **4-Hydroxy-3,4-dimethylchroman-2-one (Diastereomeric mixture) (2e)**

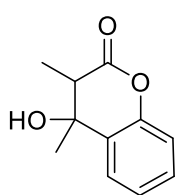

A yellow oil;  $^1\text{H}$  NMR ( $\text{CDCl}_3$ )  $\delta$ : 1.32 (d,  $J = 7.32$  Hz, 1.2H), 1.34 (d,  $J = 6.86$  Hz, 1.8H), 1.43 (s, 1.8H), 1.64 (s, 1.2H), 2.65 (q,  $J = 7.32$  Hz, 0.4H), 2.93 (q,  $J = 6.86$  Hz, 0.6H), 7.05–7.09 (m, 1H), 7.18–7.22 (m, 1H), 7.30–7.37 (m, 1H), 7.50–7.56 (m, 1H);  $^{13}\text{C}$  NMR ( $\text{CDCl}_3$ )  $\delta$ : 9.30, 10.0, 23.8, 26.6, 46.4, 46.9, 70.9, 71.8, 117.0, 124.4, 124.7, 125.1, 128.7, 129.8, 130.1, 131.2, 149.2, 149.9, 170.6; HR-MS Calcd for  $\text{C}_{11}\text{H}_{12}\text{O}_3^+$ : 192.0786 ( $\text{M}^+$ ), Found: 192.0791 ( $\text{M}^+$ ); IR (neat)  $\text{cm}^{-1}$ : 761, 1207, 1454, 1766, 3420.

#### **3-Ethyl-4-hydroxy-5,5-dimethyl-4-phenyldihydrofuran-2(3H)-one (syn-form) (2g)**

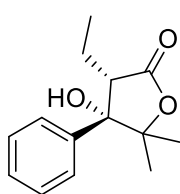

A colorless solid; Mp: 108.9–109.1  $^{\circ}\text{C}$ ;  $^1\text{H}$  NMR ( $\text{CDCl}_3$ )  $\delta$ : 1.04 (s, 3H), 1.11 (t,  $J = 7.55$  Hz, 3H), 1.45–1.55 (m, 1H), 1.50 (s, 3H), 1.84–1.95 (m, 1H), 2.07 (s, 1H), 3.35 (dd,  $J = 5.49, 8.23$ , 1H), 7.35–7.44 (m, 3H), 7.47–7.50 (m, 2H);  $^{13}\text{C}$  NMR ( $\text{CDCl}_3$ )  $\delta$ : 13.0, 17.8, 20.0, 25.6, 48.7, 83.7, 88.0, 126.4, 128.7, 128.8, 138.7, 176.5; HR-MS (FAB $^+$ ) for  $\text{C}_{14}\text{H}_{19}\text{O}_3^+$ : 235.1334 [ $\text{M}+\text{H}$ ] $^+$ , Found: 235.1339 [ $\text{M}+\text{H}$ ] $^+$ ; IR (KBr)  $\text{cm}^{-1}$ : 703, 756, 1758, 3003, 3459.

#### **3-Benzyl-4-hydroxy-5,5-dimethyl-4-phenyldihydrofuran-2(3H)-one (syn-form) (2h)**

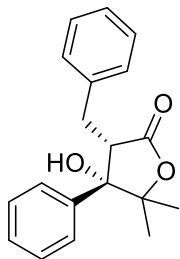

A colorless solid; Mp: 184.0–184.3  $^{\circ}\text{C}$ ;  $^1\text{H}$  NMR ( $\text{CDCl}_3$ )  $\delta$ : 1.02 (s, 3H), 1.51 (s, 3H), 2.23 (s, 1H), 2.78 (dd,  $J = 14.4, 4.8$  Hz, 1H), 3.21 (q,  $J = 7.0$  Hz, 1H), 3.72 (dd,  $J = 7.1, 4.8$  Hz, 1H), 7.27–7.13 (m, 5H), 7.36–7.30 (m, 5H);  $^{13}\text{C}$  NMR ( $\text{CDCl}_3$ )  $\delta$ : 20.1, 25.5, 30.5, 49.7, 84.2, 88.3, 126.4, 126.7, 128.6, 128.7 (2C), 129.4, 138.0, 139.2, 176.0; HR-MS for  $\text{C}_{19}\text{H}_{20}\text{O}_3^+$ : 296.1412 ( $\text{M}^+$ ), Found: 296.1407 ( $\text{M}^+$ ); IR (KBr)  $\text{cm}^{-1}$ : 697, 1056, 1560, 1752, 3482.

#### **Benzyl (2S,3S,4R)-3-hydroxy-2,3,4-trimethyl-5-oxotetrahydrofuran-2-carboxylate ((2S,3S,4R)-2j)**

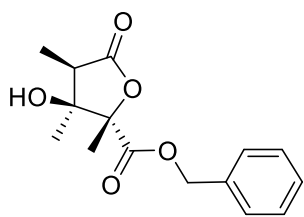

A colorless solid;  $^1\text{H}$  NMR (400 MHz,  $\text{CDCl}_3$ )  $\delta$ : 1.16 (s, 3H), 1.17 (d,  $J = 7.2$  Hz, 3H), 1.63 (s, 3H), 1.74 (s, 1H), 2.72 (q,  $J = 7.2$  Hz, 1H), 5.16 (d,  $J = 11.9$  Hz, 1H), 5.25 (d,  $J = 11.9$  Hz, 1H), 7.33–7.40 (5H, m);  $^{13}\text{C}$  NMR (100 MHz,  $\text{CDCl}_3$ )  $\delta$ : 7.37, 16.5, 21.5, 44.2, 68.1, 79.0, 89.2, 128.8, 128.9, 129.0, 134.7, 170.9, 177.4; MS  $m/z$ : 278 ( $\text{M}^+$ ). HR-MS Calcd for  $\text{C}_{15}\text{H}_{18}\text{O}_5$ : 278.1154 ( $\text{M}^+$ ), Found: 278.1156; IR (KBr)  $\text{cm}^{-1}$ : 1458, 1734, 3431.

### Thermal ellipsoid plot of the crystallographic structure:

#### X-ray crystallographic analysis of *syn-2a*:

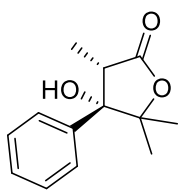

The product was recrystallized from ethyl acetate/hexane. The single crystal was mounted on a glass fiber. All measurements were made on a Rigaku R-Axis RAPID diffractometer using graphite monochromated CuK $\alpha$  ( $\lambda$  = 1.54187 Å) radiation. The  $2\theta$  (max) value cut of 68.01°. The crystal structure was solved by SHELXT<sup>2</sup> and refined by SHELXL<sup>3</sup>. The

crystallographic data were summarized in the following table.

|                                         |                                                |
|-----------------------------------------|------------------------------------------------|
| empirical formula                       | C <sub>26</sub> H <sub>32</sub> O <sub>6</sub> |
| formula weight                          | 440.54                                         |
| crystal system                          | Triclinic                                      |
| space group                             | P $\bar{1}$ (2)                                |
| a, Å                                    | 8.5541(5)                                      |
| b, Å                                    | 11.5651(7)                                     |
| c, Å                                    | 12.9776(7)                                     |
| $\alpha$ , °                            | 97.656(7)                                      |
| $\beta$ , °                             | 100.498(7)                                     |
| $\gamma$ , °                            | 104.252(7)                                     |
| V, Å <sup>3</sup>                       | 1201.96(13)                                    |
| Z                                       | 2                                              |
| D <sub>calc</sub> , g/cm <sup>3</sup>   | 1.217                                          |
| T, °C                                   | 23                                             |
| $\mu$ (CuK $\alpha$ ), cm <sup>-1</sup> | 0.698                                          |
| No. of reflens measured                 | 13308                                          |
| No. of reflens observed                 | 2169                                           |
| No. of reflens variable                 | 319                                            |
| R (All reflections)                     | 0.0583                                         |
| R <sub>w</sub> (All reflections)        | 0.0797                                         |
| Good of Fit                             | 1.085                                          |
| Max Shift/Error                         | 0.000                                          |

The crystal structure has been deposited at the Cambridge Crystallographic Data Centre (CCDC 2109686). The data can be obtained free of charge via the Internet at [www.ccdc.cam.ac.uk/conts/retrieving.html](http://www.ccdc.cam.ac.uk/conts/retrieving.html).



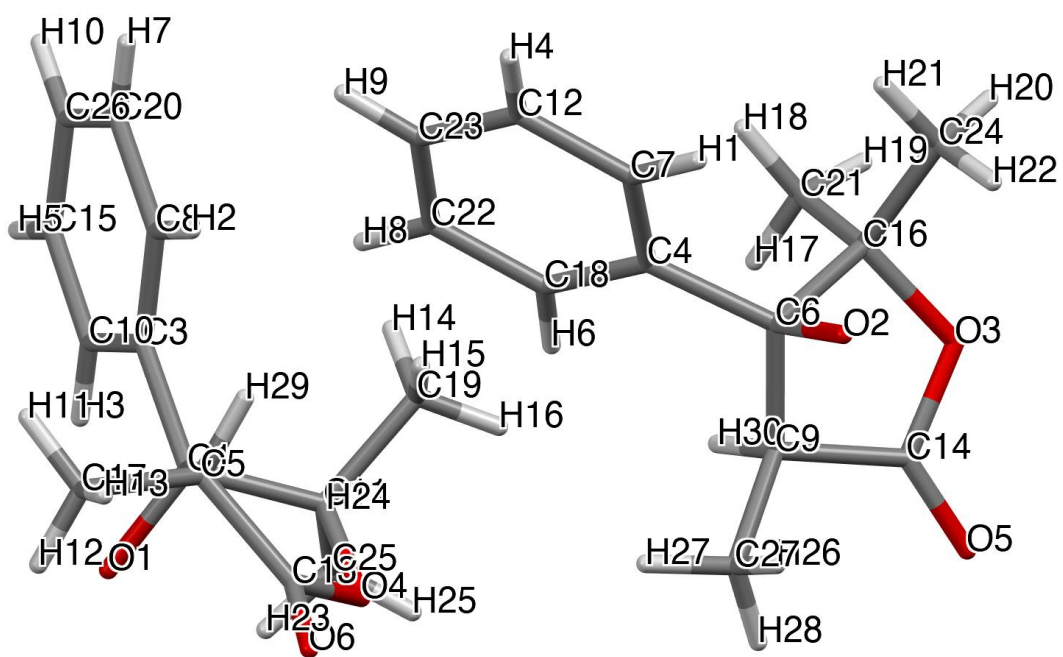

### X-ray crystallographic analysis of *anti*-2a:

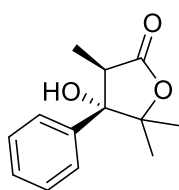

The product was recrystallized from ethyl acetate/hexane. The single crystal was mounted on a glass fiber. All measurements were made on a Rigaku R-Axis RAPID diffractometer using graphite monochromated CuK $\alpha$  ( $\lambda$  = 1.54187 Å) radiation. The  $2\theta$  (max) value cut of 68.14°. The crystal structure was solved by SHELXT<sup>2</sup> and refined by SHELXL<sup>3</sup>. The

crystallographic data were summarized in the following table.

|                                         |                                                |
|-----------------------------------------|------------------------------------------------|
| empirical formula                       | C <sub>13</sub> H <sub>16</sub> O <sub>3</sub> |
| formula weight                          | 220.27                                         |
| crystal system                          | orthorhombic                                   |
| space group                             | Iba2(45)                                       |
| a, Å                                    | 13.6211(6)                                     |
| b, Å                                    | 25.5188(12)                                    |
| c, Å                                    | 6.8860(3)                                      |
| $\beta$ , °                             | 90.0000                                        |
| V, Å <sup>3</sup>                       | 2393.53(19)                                    |
| Z                                       | 8                                              |
| $D_{\text{calc}}$ , g/cm <sup>3</sup>   | 1.222                                          |
| T, °C                                   | 23                                             |
| $\mu$ (CuK $\alpha$ ), cm <sup>-1</sup> | 0.701                                          |
| No. of reflens measured                 | 12470                                          |
| No. of reflens observed                 | 1204                                           |
| No. of reflens variable                 | 168                                            |
| R (All reflections)                     | 0.0447                                         |
| R <sub>w</sub> (All reflections)        | 0.0372                                         |
| Good of Fit                             | 1.068                                          |
| Max Shift/Error                         | 0.072                                          |

The crystal structure has been deposited at the Cambridge Crystallographic Data Centre (CCDC 2109703). The data can be obtained free of charge via the Internet at [www.ccdc.cam.ac.uk/conts/retrieving.html](http://www.ccdc.cam.ac.uk/conts/retrieving.html).

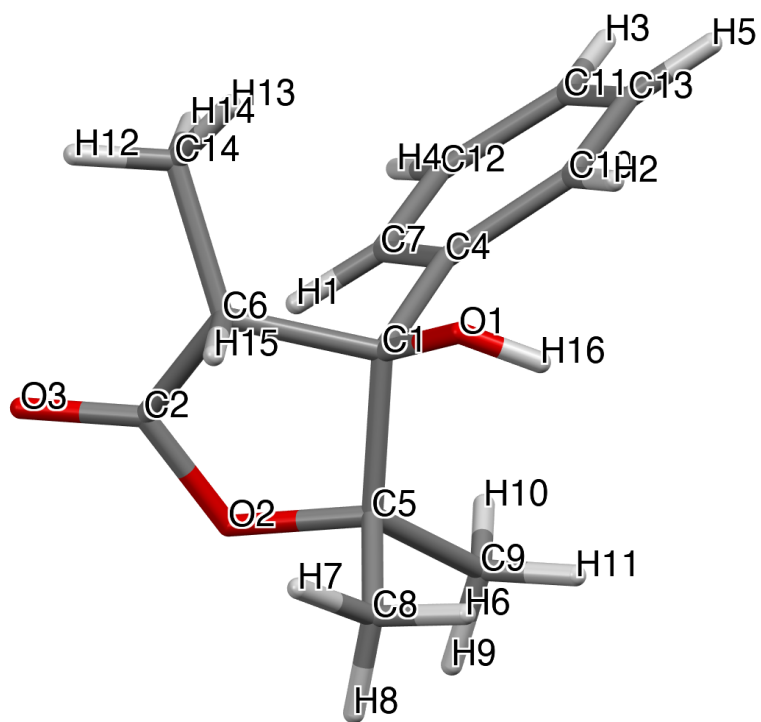

### X-ray crystallographic analysis of 2b (major form):

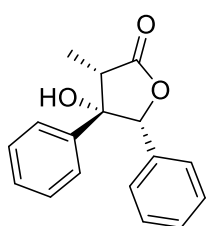

The product was recrystallized from ethyl acetate/hexane. The single crystal was mounted on a glass fiber. All measurements were made on a Rigaku R-Axis RAPID diffractometer using graphite monochromated CuK $\alpha$  ( $\lambda = 1.54187 \text{ \AA}$ ) radiation. The  $2\theta$  (max) value cut of  $68.09^\circ$ . The crystal structure was solved by SHELXT<sup>2</sup> and refined by SHELXL<sup>3</sup>. The crystallographic data were summarized in the following table.

|                                         |                                                |
|-----------------------------------------|------------------------------------------------|
| empirical formula                       | C <sub>17</sub> H <sub>16</sub> O <sub>3</sub> |
| formula weight                          | 268.31                                         |
| crystal system                          | monoclinic                                     |
| space group                             | C 2/c(15)                                      |
| a, $\text{\AA}$                         | 27.7420(10)                                    |
| b, $\text{\AA}$                         | 6.3547(2)                                      |
| c, $\text{\AA}$                         | 18.7633(7)                                     |
| $\beta$ , $^\circ$                      | 119.894(8)                                     |
| V, $\text{\AA}^3$                       | 2867.7(3)                                      |
| Z                                       | 8                                              |
| $D_{\text{calc}}$ , g/cm <sup>3</sup>   | 1.243                                          |
| T, $^\circ\text{C}$                     | 23                                             |
| $\mu$ (CuK $\alpha$ ), cm <sup>-1</sup> | 0.685                                          |
| No. of reflens measured                 | 15128                                          |
| No. of reflens observed                 | 2376                                           |
| No. of reflens variable                 | 200                                            |
| R (All reflections)                     | 0.0459                                         |
| R <sub>w</sub> (All reflections)        | 0.0708                                         |
| Good of Fit                             | 1.614                                          |
| Max Shift/Error                         | 0.020                                          |

The crystal structure has been deposited at the Cambridge Crystallographic Data Centre (CCDC 2109704). The data can be obtained free of charge via the Internet at [www.ccdc.cam.ac.uk/conts/retrieving.html](http://www.ccdc.cam.ac.uk/conts/retrieving.html).

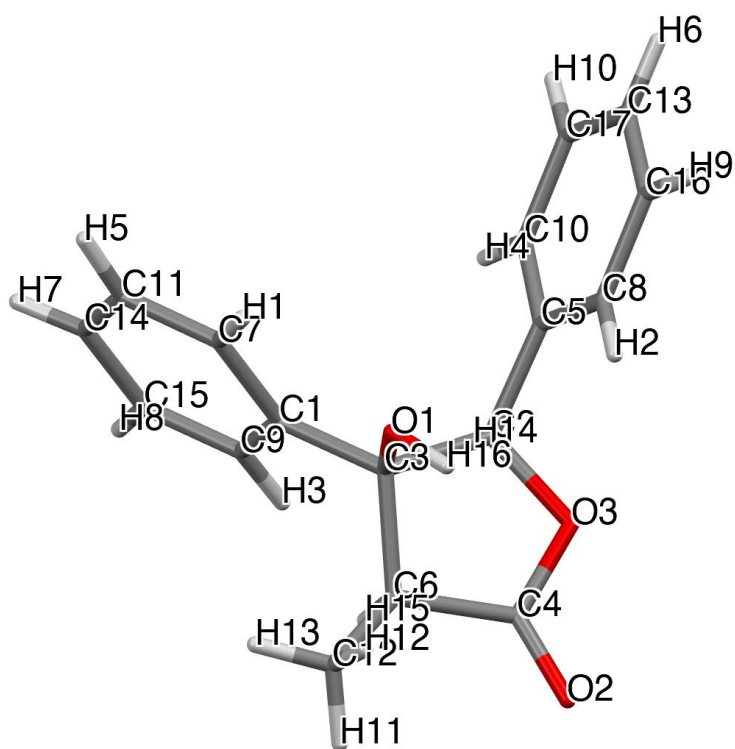

### X-ray crystallographic analysis of (2*S*,3*S*,4*R*)-2j:

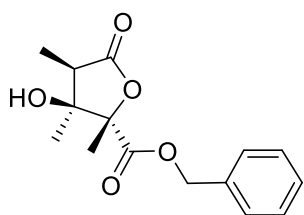

The product was recrystallized from ethyl acetate/hexane. The single crystal was mounted on a glass fiber. All measurements were made on a Rigaku R-Axis RAPID diffractometer using graphite monochromated CuK $\alpha$  ( $\lambda = 1.54187$  Å) radiation. The  $2\theta$  (max) value cut of  $136.4^\circ$ . The crystal structure was solved by SHELXT<sup>2</sup> and refined by SHELXL<sup>3</sup>. The crystallographic data

were summarized in the following table.

|                                              |                                                |
|----------------------------------------------|------------------------------------------------|
| empirical formula                            | C <sub>15</sub> H <sub>18</sub> O <sub>5</sub> |
| formula weight                               | 278.30                                         |
| crystal system                               | monoclinic                                     |
| space group                                  | P 2 <sub>1</sub> (4)                           |
| a, Å                                         | 7.7895(5)                                      |
| b, Å                                         | 10.8470(6)                                     |
| c, Å                                         | 8.8801(5)                                      |
| $\beta$ , °                                  | 91.079(6)                                      |
| <i>V</i> , Å <sup>3</sup>                    | 750.17(8)                                      |
| <i>Z</i>                                     | 2                                              |
| <i>D</i> <sub>calc</sub> , g/cm <sup>3</sup> | 1.232                                          |
| <i>T</i> , °C                                | 23                                             |
| $\mu$ (CuK $\alpha$ ), cm <sup>-1</sup>      | 0.770                                          |
| No. of reflens measured                      | 8338                                           |
| No. of reflens observed                      | 2521                                           |
| No. of reflens variable                      | 189                                            |
| R (All reflections)                          | 0.0369                                         |
| R <sub>w</sub> (All reflections)             | 0.1142                                         |
| Good of Fit                                  | 0.839                                          |
| Max Shift/Error                              | 0.004                                          |

The crystal structure has been deposited at the Cambridge Crystallographic Data Centre (CCDC 2111153). The data can be obtained free of charge via the Internet at [www.ccdc.cam.ac.uk/conts/retrieving.html](http://www.ccdc.cam.ac.uk/conts/retrieving.html).

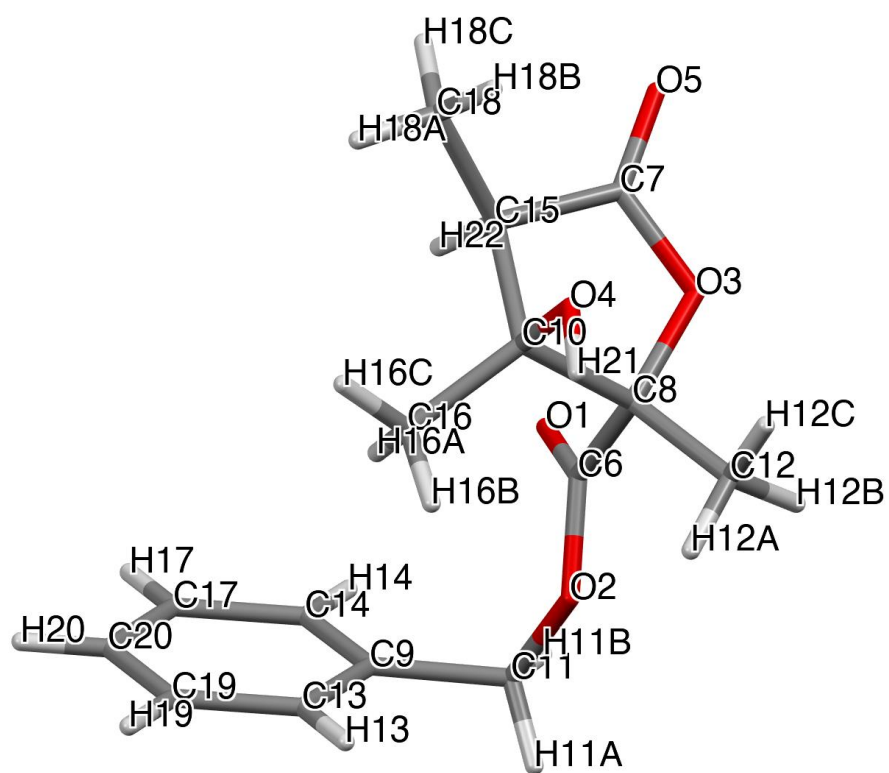

**References:**

- [1] Isoda, M.; Sato, K.; Tokura, Y.; Tarui, A.; Omote, M.; Ando, A. *Chem. Pharm. Bull.* 2014, 62, 956–961.
- [2] Sheldrick, G. M. (2014) SHELXT Version 2014/5, *Acta Cryst.* A70, C1437.
- [3] Sheldrick, G.M. (2008) SHELXL Version 2018/1, *Acta Cryst.* A64, 112-122.



## NMR charts:

$^1\text{H}$  NMR (400 MHz) and  $^{13}\text{C}$  NMR (100 MHz) spectra of *syn*-2a ( $\text{CDCl}_3$ )

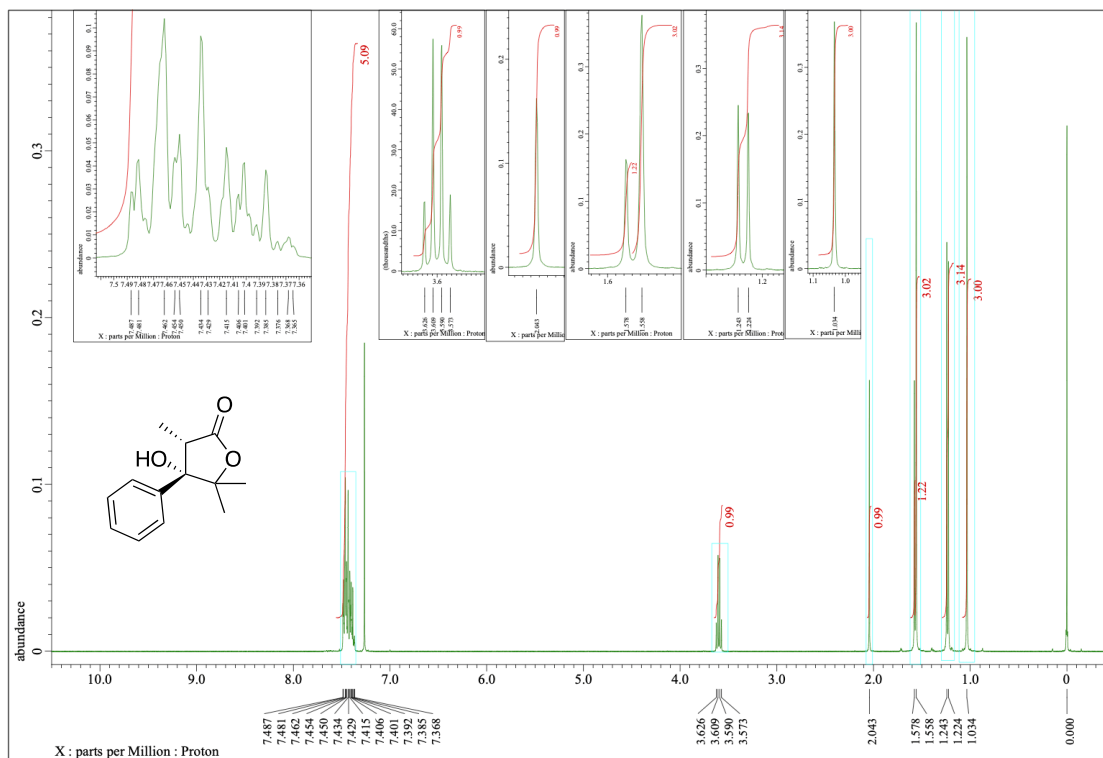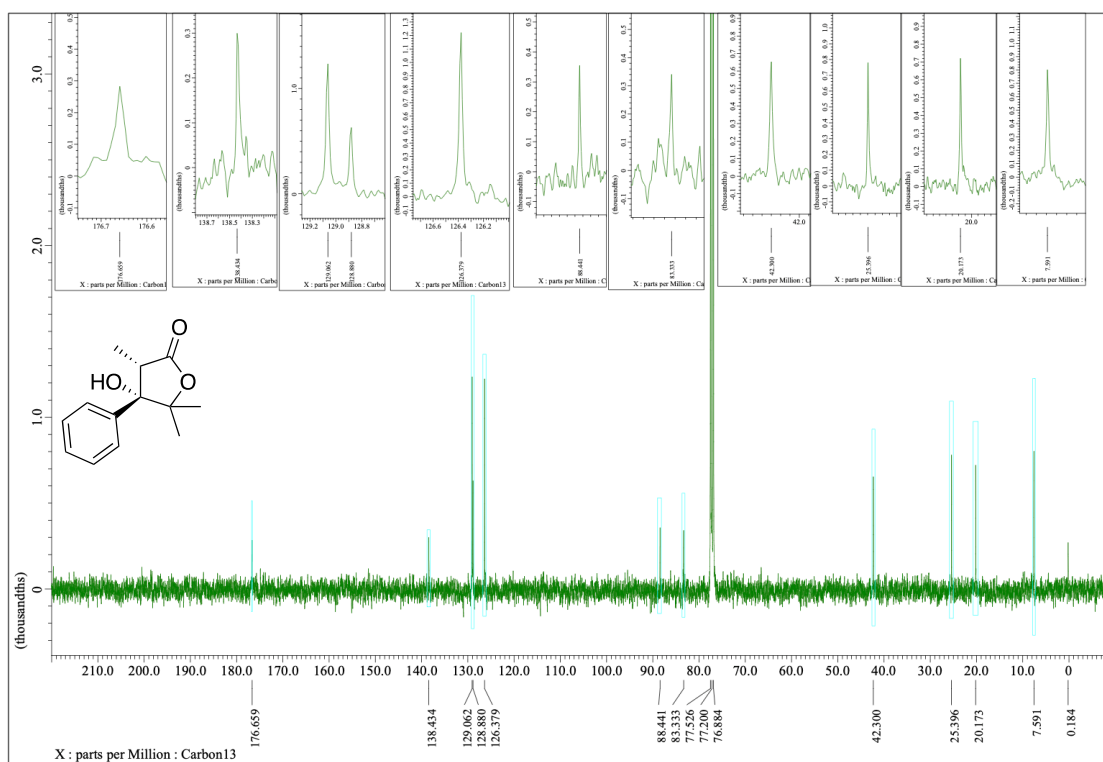

**$^1\text{H}$  NMR (400 MHz) and  $^{13}\text{C}$  NMR (100 MHz) spectra of *anti*-2a ( $\text{CDCl}_3$ )**

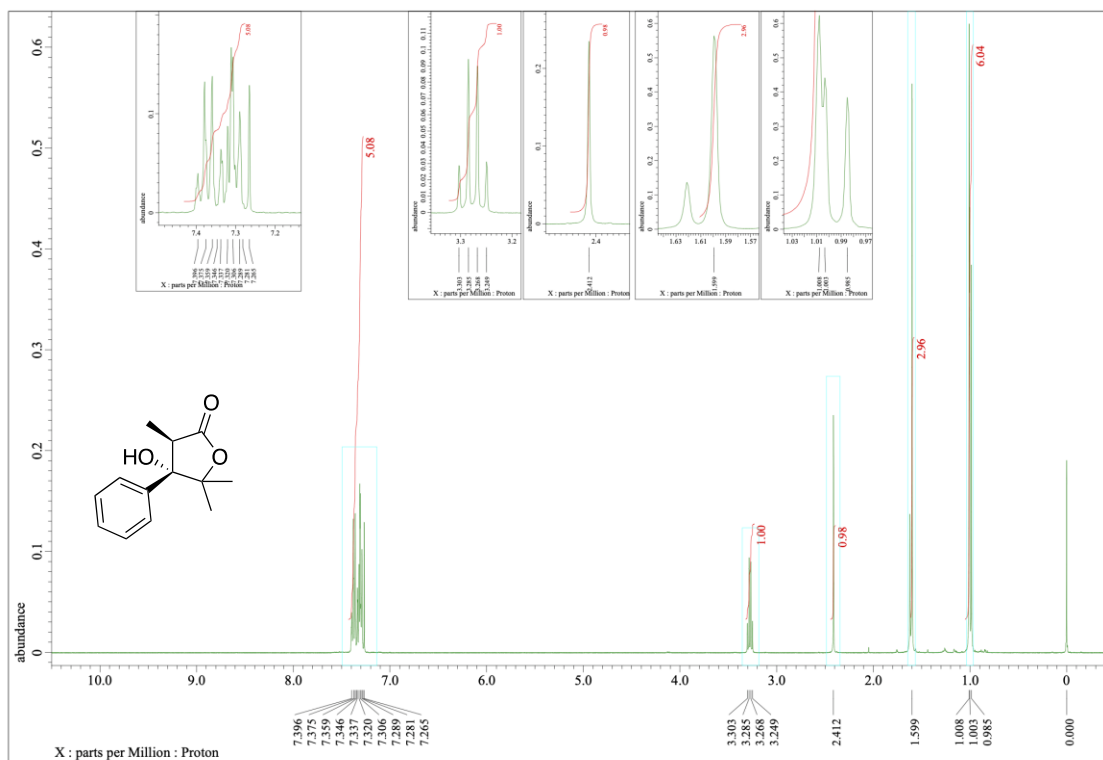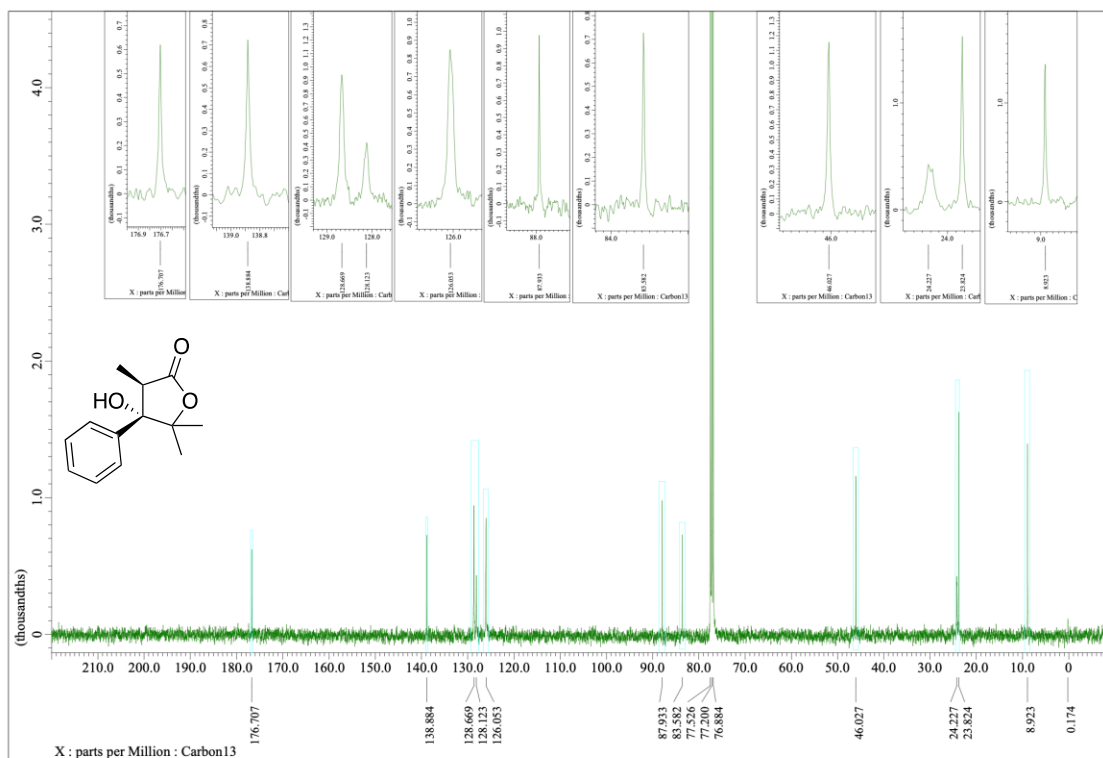

**$^1\text{H}$  NMR (400 MHz) and  $^{13}\text{C}$  NMR (100 MHz) spectra of 2b ( $\text{CDCl}_3$ )**

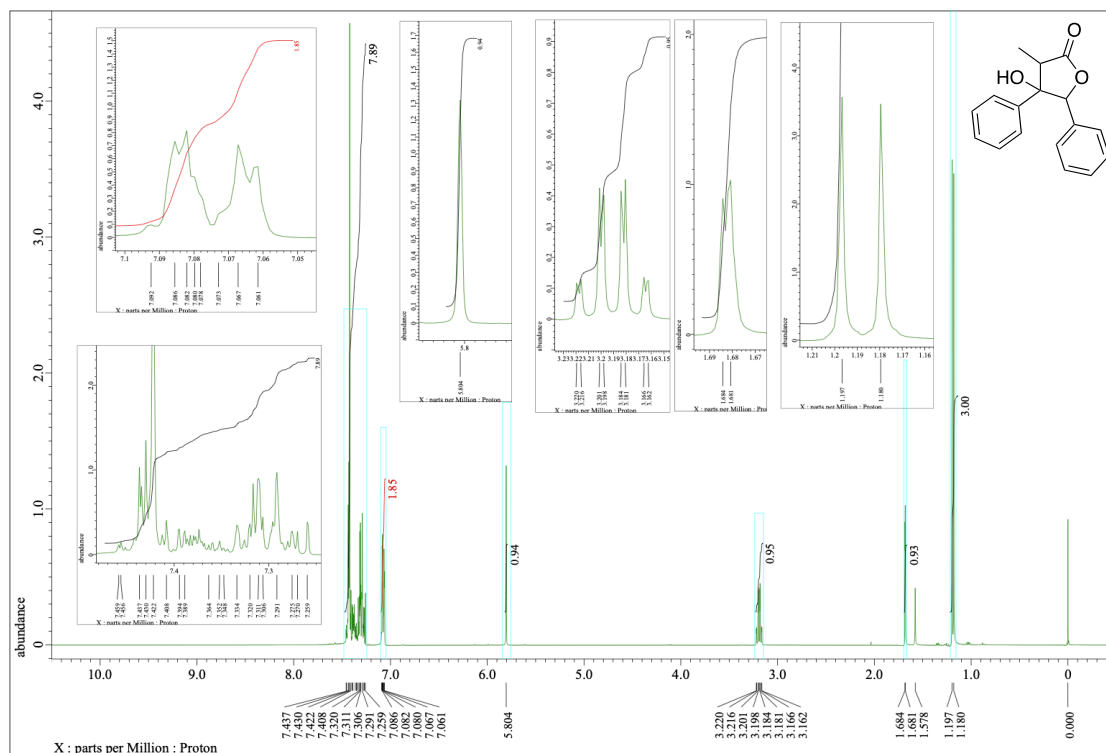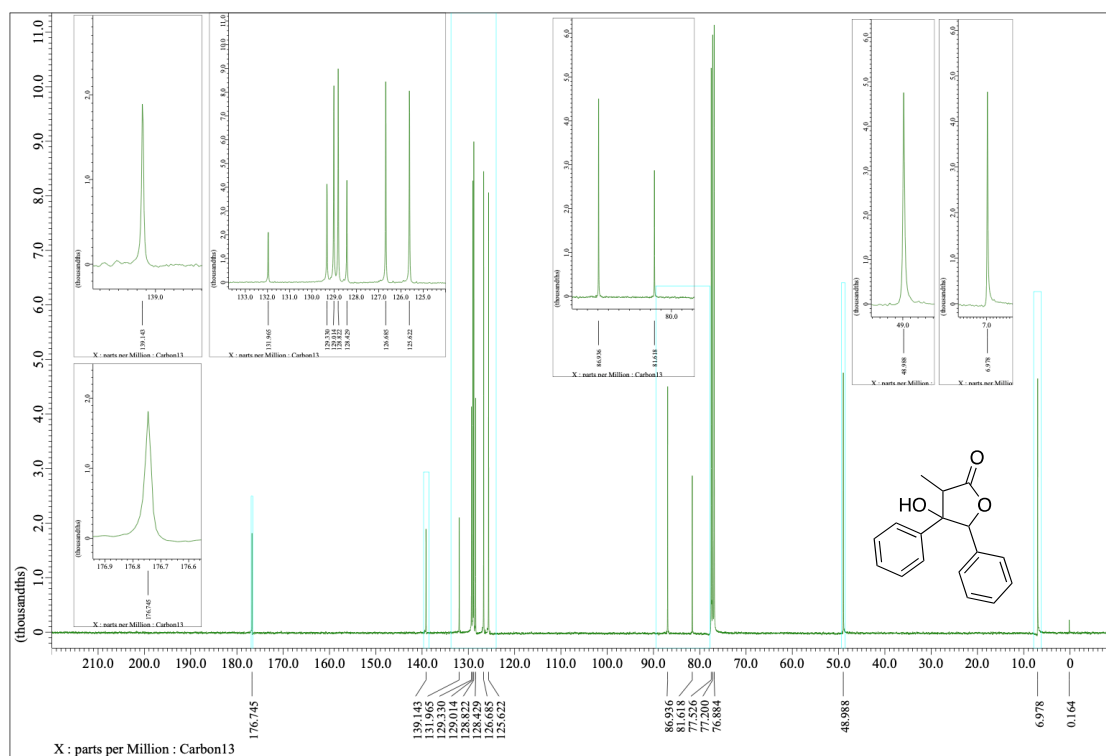

**$^1\text{H}$  NMR (400 MHz) and  $^{13}\text{C}$  NMR (100 MHz) spectra of 2c ( $\text{CDCl}_3$ )**

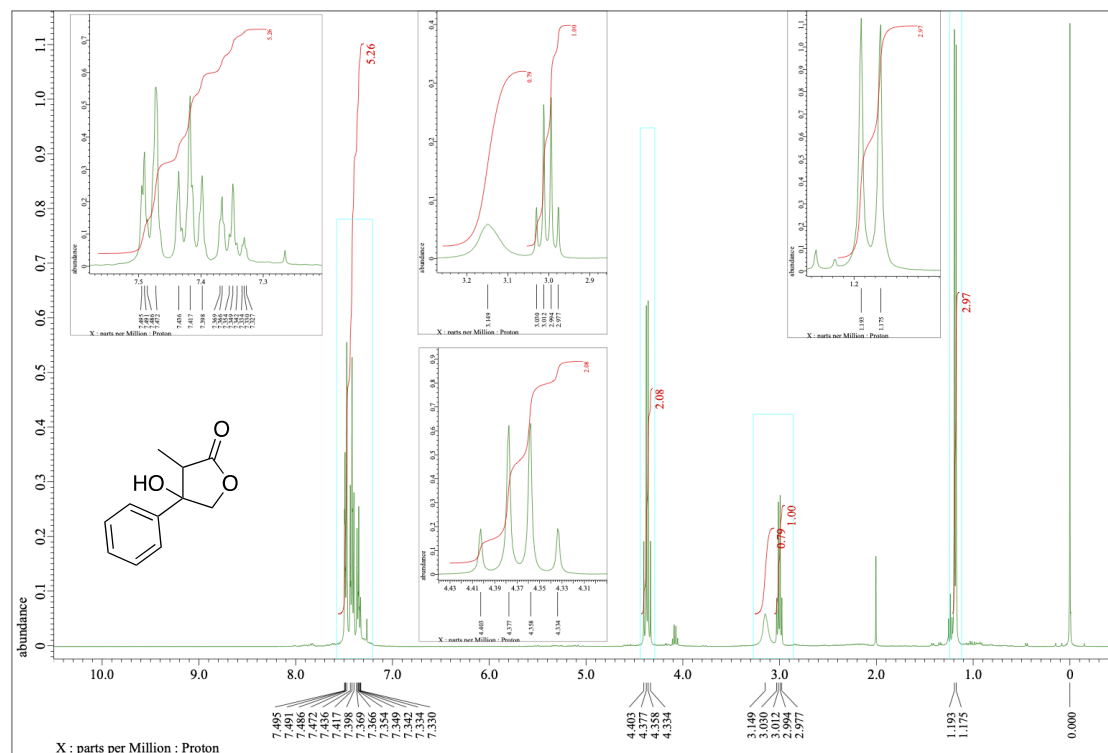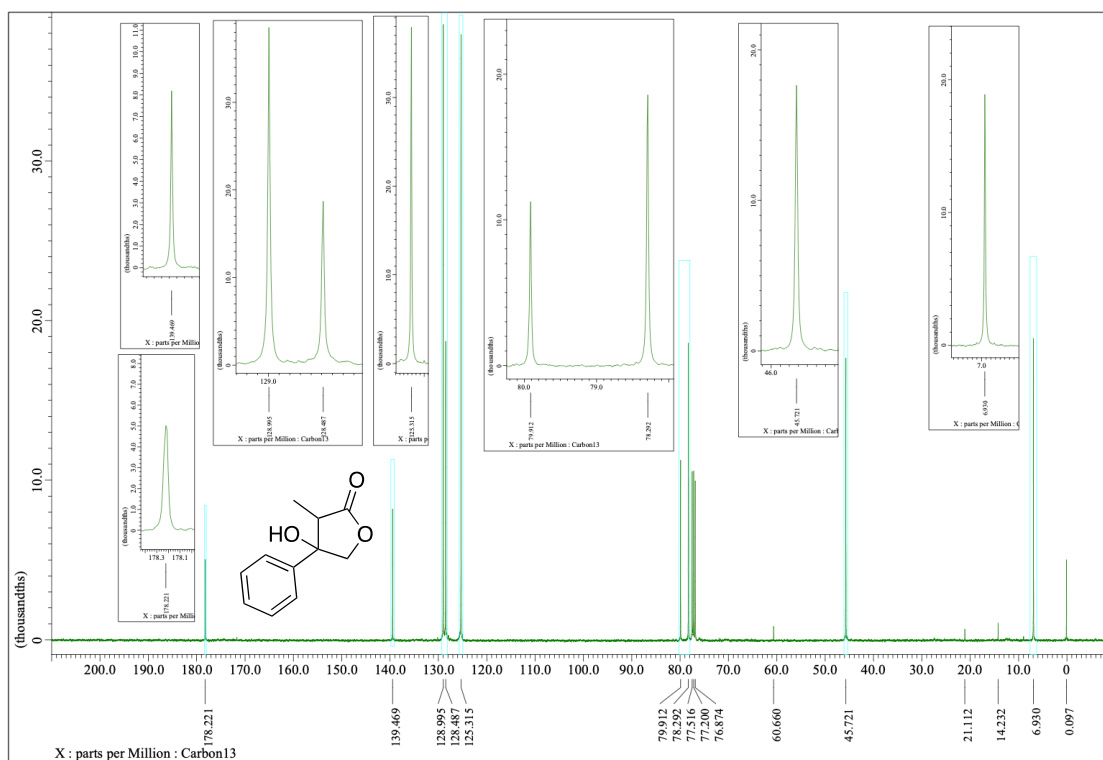

**$^1\text{H}$  NMR (400 MHz) and  $^{13}\text{C}$  NMR (100 MHz) spectra of 2d ( $\text{CDCl}_3$ )**

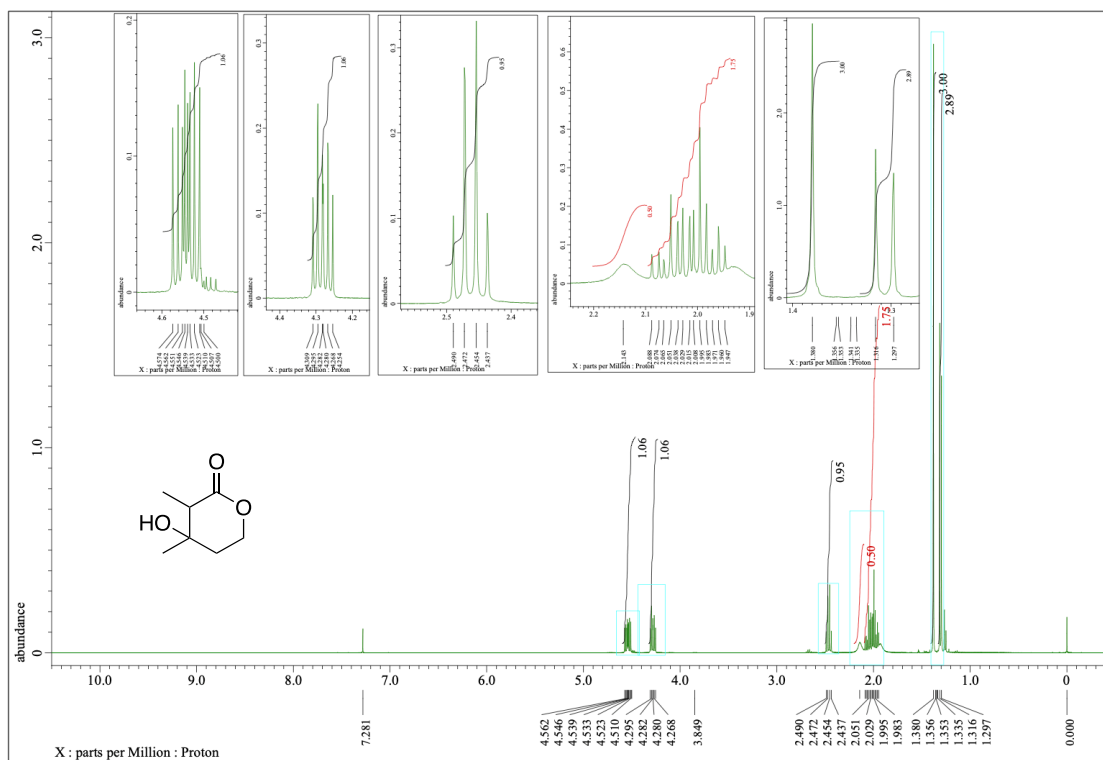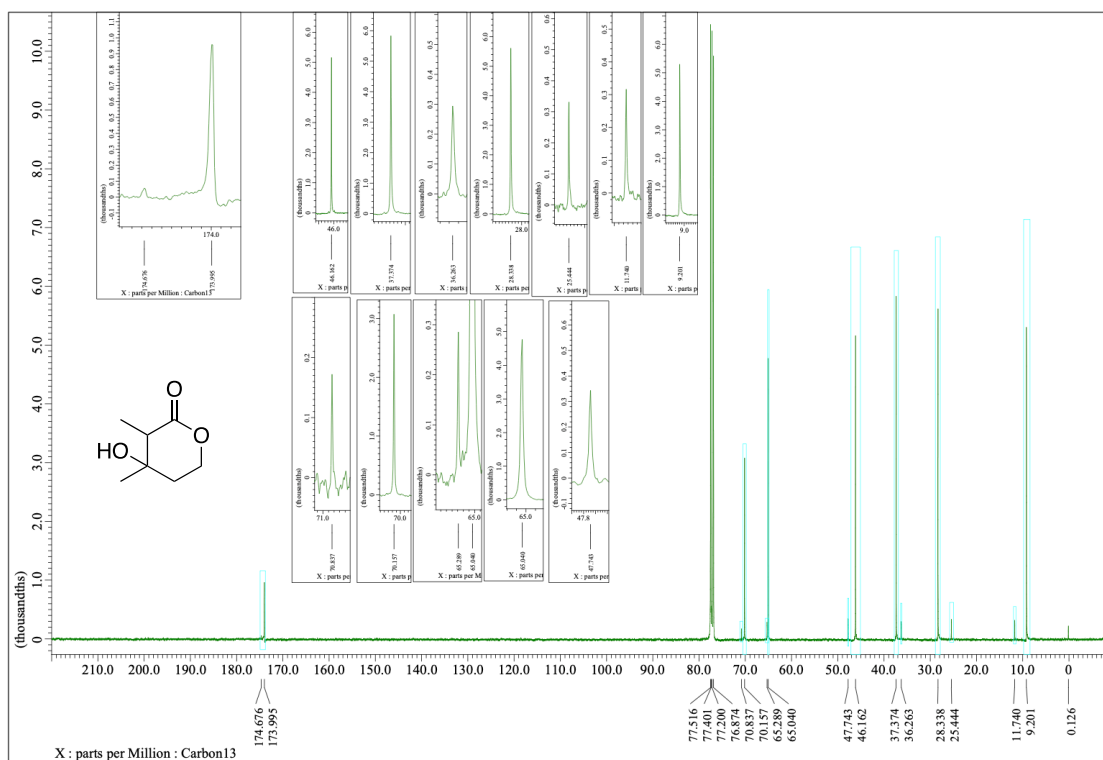

**$^1\text{H}$  NMR (400 MHz) and  $^{13}\text{C}$  NMR (100 MHz) spectra of 2e ( $\text{CDCl}_3$ )**

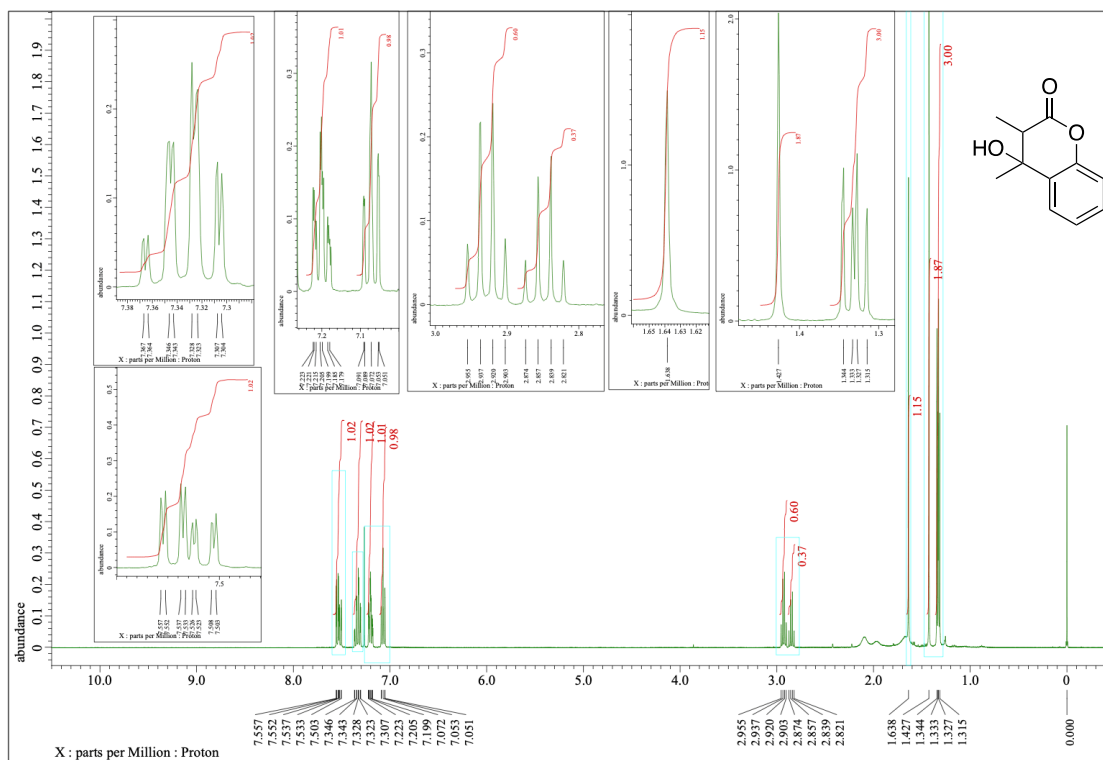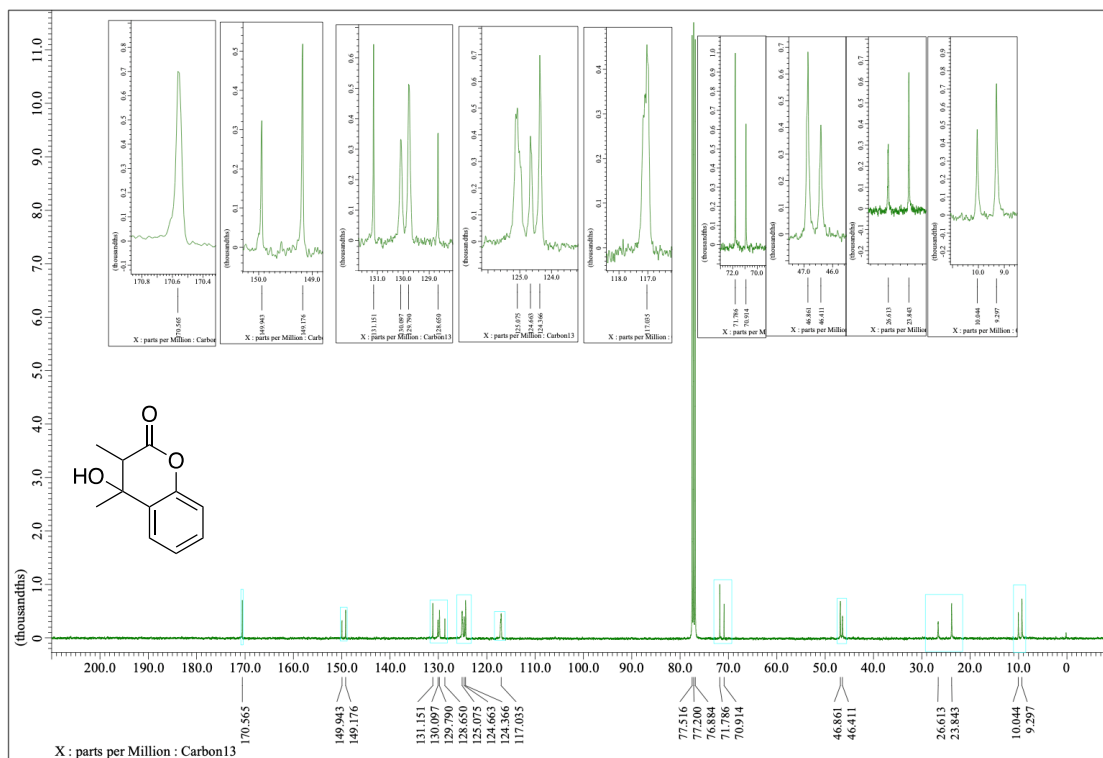

**$^1\text{H}$  NMR (400 MHz) and  $^{13}\text{C}$  NMR (100 MHz) spectra of 2g ( $\text{CDCl}_3$ )**

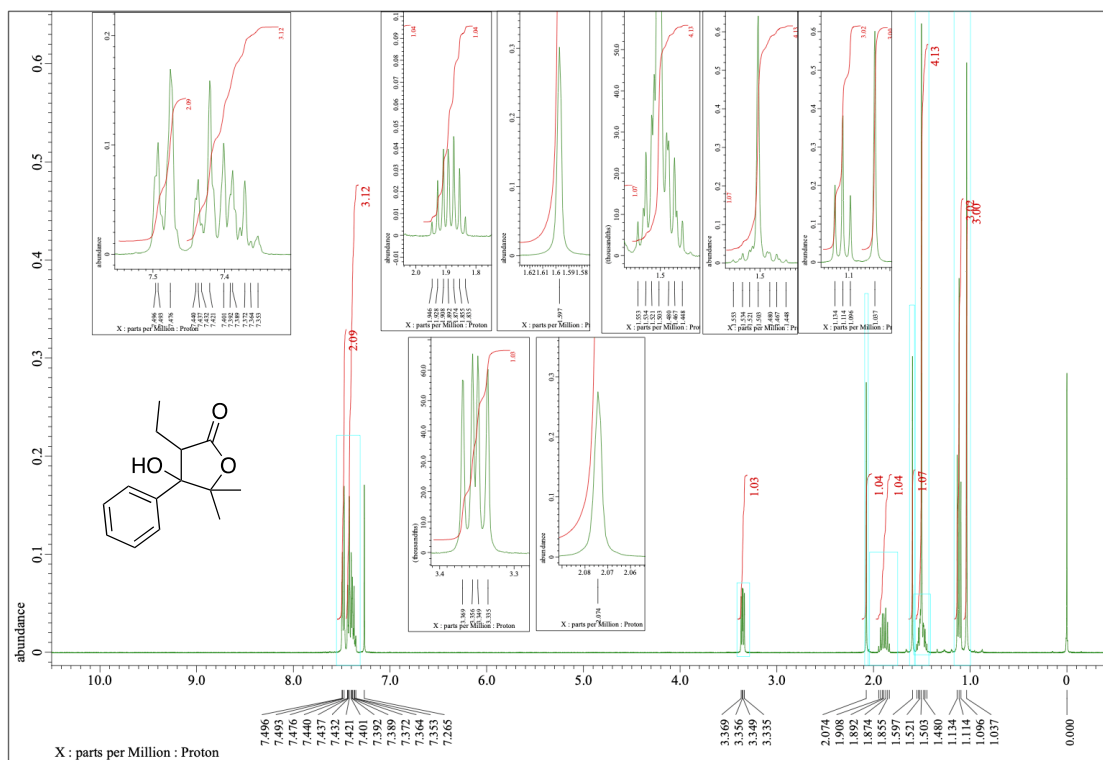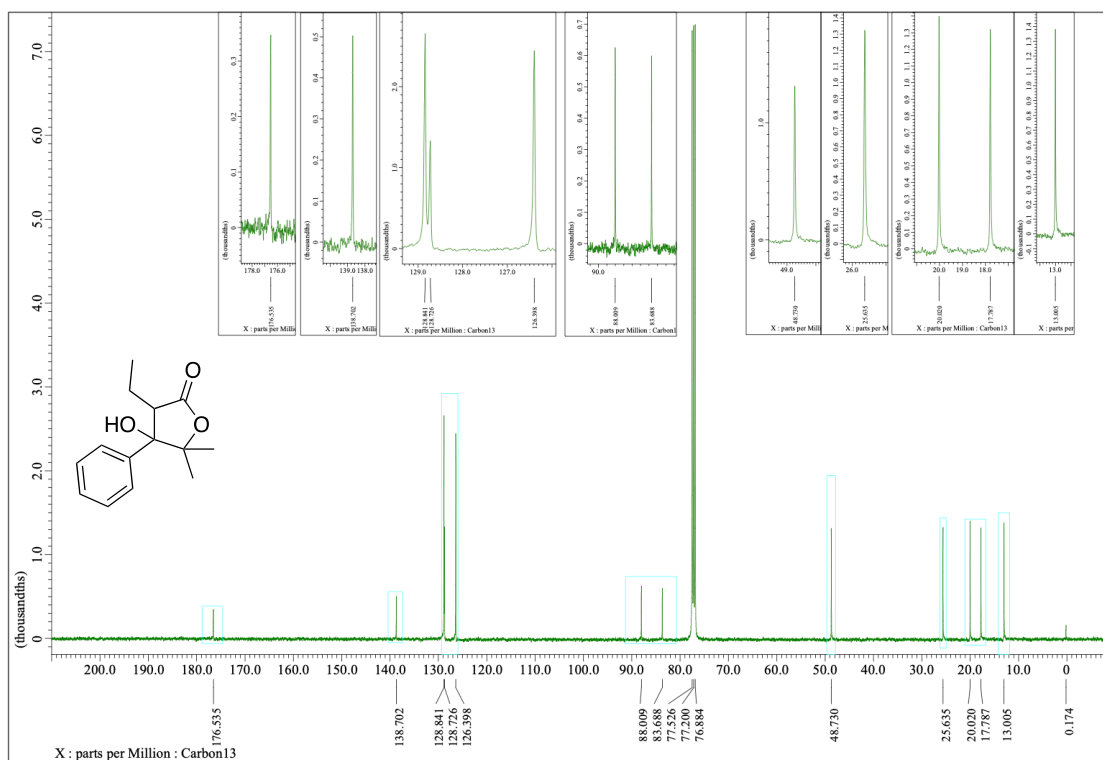

**$^1\text{H}$  NMR (400 MHz) and  $^{13}\text{C}$  NMR (100 MHz) spectra of 2h ( $\text{CDCl}_3$ )**

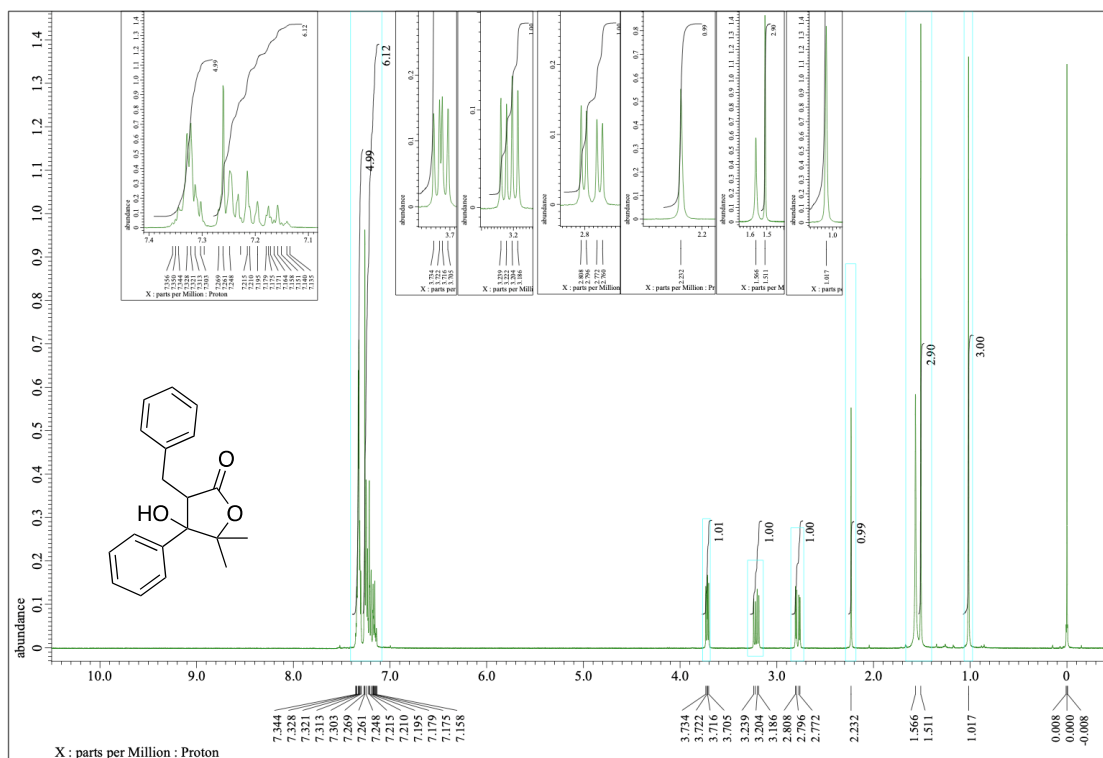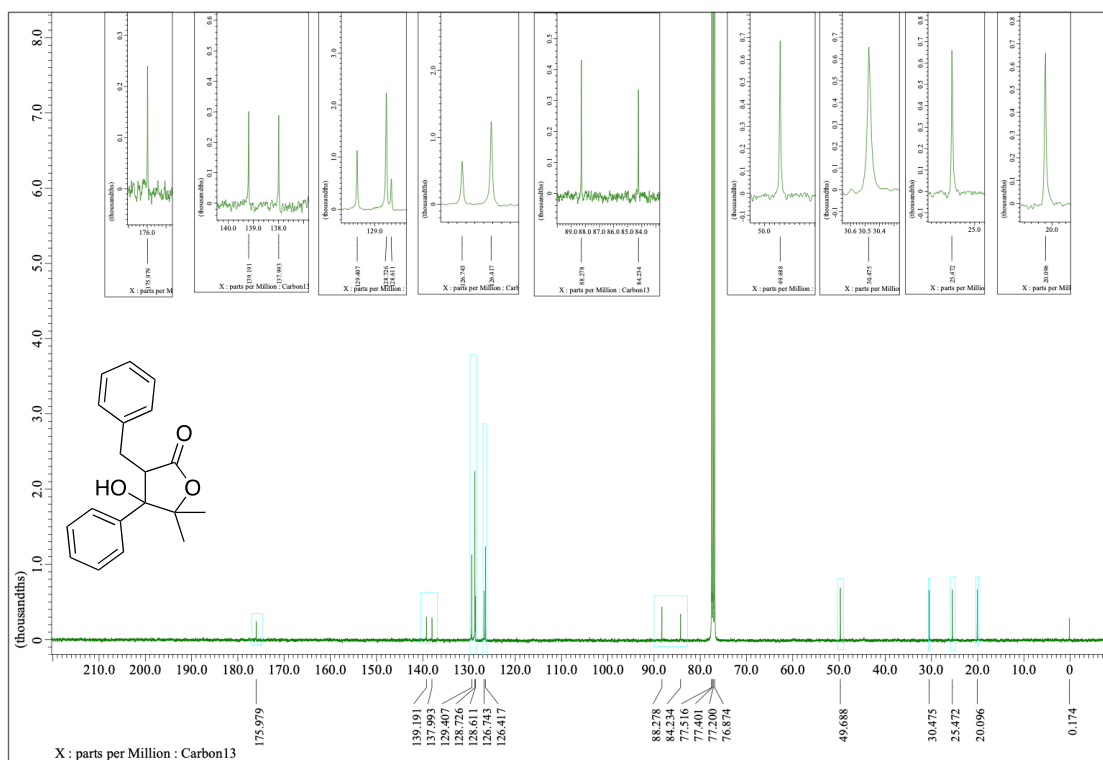



**$^1\text{H}$  NMR (400 MHz) and  $^{13}\text{C}$  NMR (100 MHz) spectra of 2j ( $\text{CDCl}_3$ )**

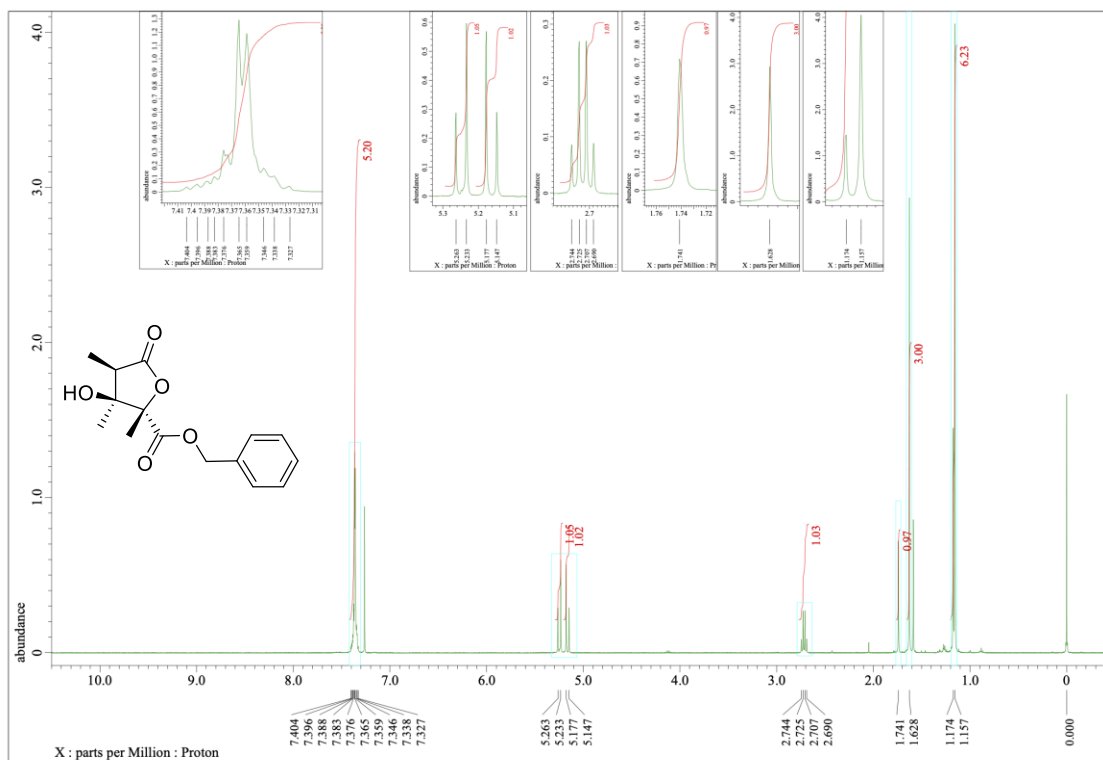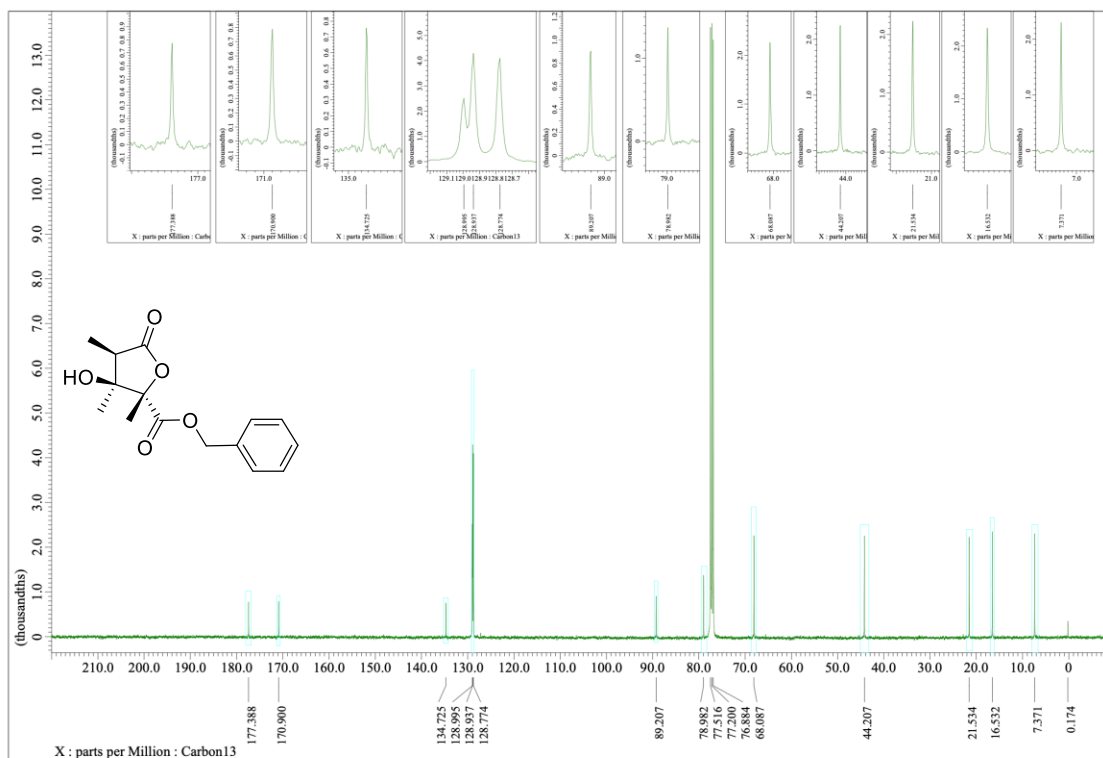

Supplement: Additional file 1 [file 1860-5397-18-176-S1.pdf]
